# Supplementary material for: Mammalian Taste Bud Cells Utilize Extragemmal 5-Hydroxy-L-Tryptophan to Biosynthesize the Neurotransmitter Serotonin
Source: Front Cell Neurosci. 2018 Nov 26;12:461. doi: 10.3389/fncel.2018.00461 (PMC6275321; doi:10.3389/fncel.2018.00461)
Supplement: Supplementary file 1 [file Table_1.xlsx]

## Sheet: 工作表1
Antibodies	The primary antibodies
	Antibody	Species	Supplier	Cat. Number	Dilution
	Tph Antibody	Mouse	Sigma-Aldrich	T0678	1:250
	Rabbit Polyclonal Anti-Serotonin Antibodies	Rabbit	Sigma-Aldrich	S5545	1:2000
	5-Htp (5-Hydroxytryptophan) Antibody	Rabbit	immunostar	24446	1:1000
	Mouse/Rat Cd39l1/Entpd2 Affinity Purified Polyclonal Ab	Sheep	R&D Systems	AF5797	1:400
	Mouse Carbonic Anhydrase IV Affinity Purified Polyclonal Ab	Goat	R&D Systems	AF2414	1:400
	TPM5 Antibody (N-20)	Goat	Santa Cruz Biotechnology	sc-27366	1:400
	Secondary Antibodies
	antibody	Species	Supplier	Cat. Number	Dilution
	Donkey Anti-Goat IgG H&L (Alexa Fluor 488)	Donkey	Abcam	ab150129	1:400
	Donkey Anti-Sheep IgG H&L (Alexa Fluor 488)	Donkey	Abcam	ab150177	1:400
	Donkey Anti-Rabbit IgG H&L (Alexa Fluor 568)	Donkey	Abcam	ab175470	1:400
	Donkey Anti-Mouse IgG H&L (Alexa Fluor 568)	Donkey	Abcam	ab175472	1:400
Sequence of qPCR Primer Pairs
Gene	Sequence	Product Size
Gapdh	AACGACCCCTTCATTGAC	191
	TCCACGACATACTCAGCAC
Entpd2	TGCGCCTACTCAACCTGAC	183
	CCCAGCCATACTTGATGAAGTT
Scnn1a	TACTTCAGCTACCCCGTGAGT	153
	AAAAAGCGTCTGTTCCGTGAT
Trpm5	CCCTGTCTTACCCTGAGTTC	205
	GCATTGGGTACCCTTGAGCA
Gnat3	TGCCTATGACATGGTGCTTG	164
	GGTGCACCTTAGCCACTTTC
Pkd2l1	TACAGCGACCCTCCTTCCC	164
	CCTCTGATGCTCCGACAGATATG
Snap-25	CAACTGGAACGCATTGAGGAA	177
	GGCCACTACTCCATCCTGATTAT
Car4	CTGCTAGGACAAAGGTGAACC	100
	TCCACTGTGTGTTGATTGTTCTT
Slc6a4	GATTCACCAAGGGGAACGGG	149
	TGGTGTAAGGGAGGAGGAAGG
Bndf	TTACCTGGATGCCGCAAACAT	101
	TGACCCACTCGCTAATACTGTC
Tph1	GCGCCCGTTTGGACTGAAGTA	207
	GCCCTGGCTCTAGACTGATGCTC
